# Supplementary material for: Twenty-Two Percent Efficient Pb-Free All-Perovskite Tandem Solar Cells Using SCAPS-1D
Source: MDPI journal article supplement (doi:10.3390/nano13010096), 2022-12-25
Supplement: s1 [file s1]

# Twenty-Two Percent Efficient Pb-Free All-Perovskite Tandem Solar Cells Using SCAPS-1D

Ali Alsalmeh\* and Huda Alsaeedi

Department of Chemistry, College of Science, King Saud University, Riyadh 11451, Saudi Arabia

\* Correspondence: aalsalme@ksu.edu.sa

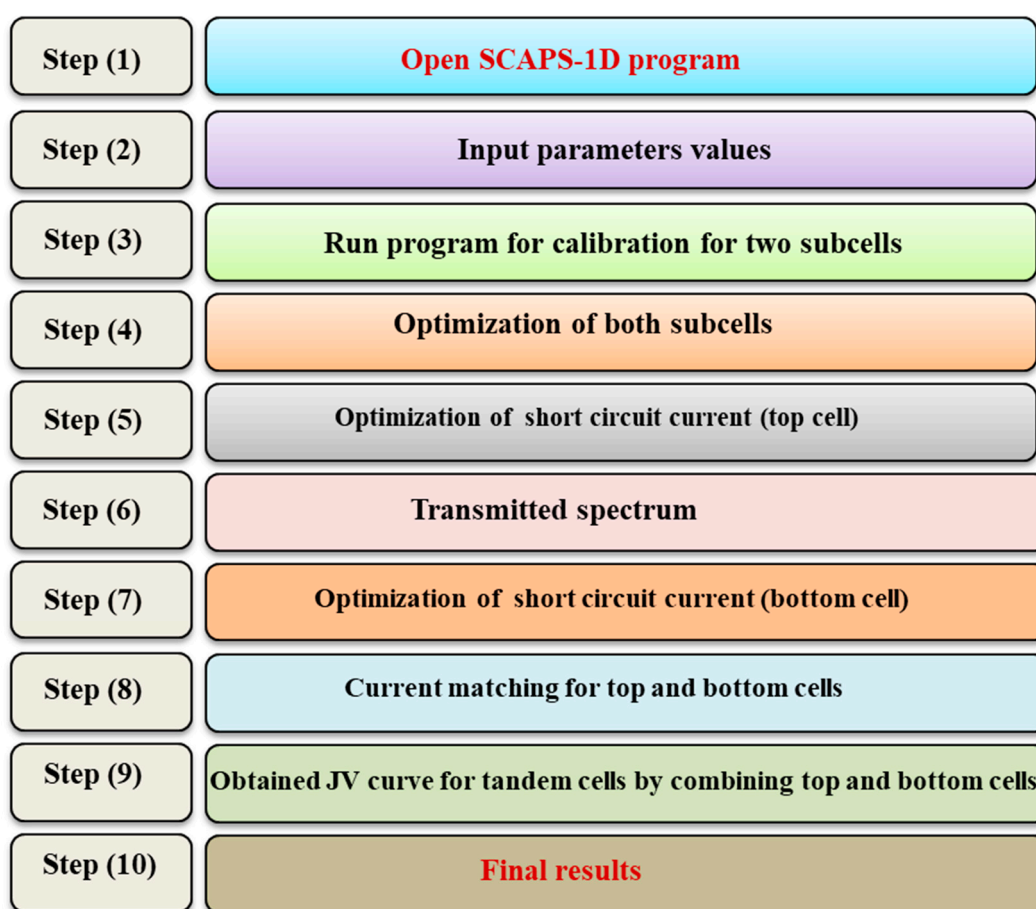

Figure S1. Flow chart for the simulation of tandem solar cells.

**Table S1.** Numerical parameters of different materials for device simulation.

| Parameters                                                | FTO                  | ZnSe                 | MAGeI <sub>3</sub> | FAMASnGeI <sub>3</sub> | Cu <sub>2</sub> O      |
|-----------------------------------------------------------|----------------------|----------------------|--------------------|------------------------|------------------------|
| Thickness (nm)                                            | 500                  | Varying              | 500                | 500                    | varying                |
| Band Gap (eV)                                             | 3.5                  | 2.81                 | 1.9                | 1.4                    | 2.17                   |
| Electron affinity (eV)                                    | 4                    | 4.09                 | 3.9                | 3.67                   | 3.2                    |
| Dielectric permittivity                                   | 9                    | 8.6                  | 10                 | 8.2                    | 7.11                   |
| CB effective density of states (1 cm <sup>-3</sup> )      | $2.2 \times 10^{18}$ | $2.2 \times 10^{18}$ | $1 \times 10^{16}$ | $2.2 \times 10^{18}$   | $2.020 \times 10^{17}$ |
| VB effective density of states (1 cm <sup>-3</sup> )      | $1.8 \times 10^{19}$ | $1.8 \times 10^{19}$ | $1 \times 10^{15}$ | $1.8 \times 10^{19}$   | $1.10 \times 10^{19}$  |
| Electron thermal velocity (cm S <sup>-1</sup> )           | $1 \times 10^7$      | $1 \times 10^7$      | $1 \times 10^7$    | $1 \times 10^7$        | $1 \times 10^7$        |
| Hole thermal velocity (cm S <sup>-1</sup> )               | $1 \times 10^7$      | $1 \times 10^7$      | $1 \times 10^7$    | $1 \times 10^7$        | $1 \times 10^7$        |
| Electron mobility (cm <sup>2</sup> VS <sup>-1</sup> )     | 20                   | 110                  | 16.2               | 20                     | 200                    |
| Hole mobility (cm <sup>2</sup> VS <sup>-1</sup> )         | 10                   | 400                  | 10.1               | 20                     | 80                     |
| Shallow uniform donor density ND (1 cm <sup>-3</sup> )    | $2 \times 10^{19}$   | $1 \times 10^{18}$   | $1 \times 10^9$    | $1 \times 10^{13}$     | 0                      |
| Shallow uniform acceptor density NA (1 cm <sup>-3</sup> ) | -                    | 0                    | $1 \times 10^9$    | 0                      | $1 \times 10^{18}$     |
| Defect density (Nt)                                       | $1 \times 10^{15}$   | $1 \times 10^{15}$   | $1 \times 10^{14}$ | $1 \times 10^{15}$     | $1 \times 10^{15}$     |
| References                                                | [1]                  | [2]                  | [1]                | [1]                    | [1]                    |

**Table S2.** Numerical parameters of different ETLs for device simulation.

| Parameters                                                | TiO <sub>2</sub>     | ZnO                  | SnO <sub>2</sub>     | ZnSe                 | WO <sub>3</sub>       |
|-----------------------------------------------------------|----------------------|----------------------|----------------------|----------------------|-----------------------|
| Thickness (nm)                                            | 50                   | 50                   | 50                   | varying              | 50                    |
| Band Gap (eV)                                             | 3.2                  | 3.3                  | 3.5                  | 2.81                 | 2.92                  |
| Electron affinity (eV)                                    | 4.2                  | 4                    | 4.4                  | 4.09                 | 4.59                  |
| Dielectric permittivity                                   | 10                   | 9                    | 9                    | 8.6                  | 5.76                  |
| CB effective density of states (1 cm <sup>-3</sup> )      | $2.2 \times 10^{18}$ | $3.7 \times 10^{18}$ | $2.2 \times 10^{18}$ | $2.2 \times 10^{18}$ | $1.96 \times 10^{19}$ |
| VB effective density of states (1 cm <sup>-3</sup> )      | $1.8 \times 10^{19}$ | $1.8 \times 10^{19}$ | $1.8 \times 10^{19}$ | $1.8 \times 10^{19}$ | $1.96 \times 10^{19}$ |
| Electron thermal velocity (cm S <sup>-1</sup> )           | $1 \times 10^7$       |
| Hole thermal velocity (cm S <sup>-1</sup> )               | $1 \times 10^7$       |
| Electron mobility (cm <sup>2</sup> VS <sup>-1</sup> )     | 100                  | 100                  | 20                   | 110                  | 10                    |
| Hole mobility (cm <sup>2</sup> VS <sup>-1</sup> )         | 25                   | 25                   | 10                   | 400                  | 10                    |
| Shallow uniform donor density ND (1 cm <sup>-3</sup> )    | $1 \times 10^{19}$   | $5 \times 10^{17}$   | $2 \times 10^{19}$   | $1 \times 10^{18}$   | $3.68 \times 10^{19}$ |
| Shallow uniform acceptor density NA (1 cm <sup>-3</sup> ) | 0                    | 0                    | 0                    | 0                    | 0                     |
| Defect density (Nt)                                       | $1 \times 10^{15}$    |
| References                                                | [2]                  | [1]                  | [1]                  | [2]                  | [3]                   |

**Table S3.** Effect of thickness of ZnSe on photovoltaic parameters.

| Cu <sub>2</sub> O (nm) | FAMASnGeI <sub>3</sub> (nm) | Thickness of MAGeI <sub>3</sub> (nm) | Thickness of ZnSe (nm) | Thickness of FTO (nm) | Voc (V) | Jsc (mA/cm <sup>2</sup> ) | FF (%) | PCE (%) |
|------------------------|-----------------------------|--------------------------------------|------------------------|-----------------------|---------|---------------------------|--------|---------|
| 350                    | 500                         | 500                                  | 50                     | 500                   | 0.9507  | 29.055972                 | 81.10  | 22.40   |
| 350                    | 500                         | 500                                  | 70                     | 500                   | 0.9505  | 28.905398                 | 81.11  | 22.28   |
| 350                    | 500                         | 500                                  | 100                    | 500                   | 0.9501  | 28.699250                 | 81.12  | 22.12   |

**Table S4.** Effect of thickness of Cu<sub>2</sub>O on photovoltaic parameters.

| Cu <sub>2</sub> O (nm) | FAMASnGeI <sub>3</sub> (nm) | Thickness of MAgel <sub>3</sub> (nm) | Thickness of ZnSe (nm) | Thickness of FTO (nm) | V <sub>oc</sub> (V) | J <sub>sc</sub> (mA/cm <sup>2</sup> ) | FF (%) | PCE (%) |
|------------------------|-----------------------------|--------------------------------------|------------------------|-----------------------|---------------------|---------------------------------------|--------|---------|
| 150                    | 500                         | 500                                  | 50                     | 500                   | 0.9507              | 29.054281                             | 81.10  | 22.40   |
| 350                    | 500                         | 500                                  | 50                     | 500                   | 0.9507              | 29.055972                             | 81.10  | 22.40   |
| 500                    | 500                         | 500                                  | 50                     | 500                   | 0.9507              | 29.056919                             | 81.10  | 22.40   |

**Table S5.** Effect of different ETLs on photovoltaic parameters.

| Cu <sub>2</sub> O (nm) | FAMASnGeI <sub>3</sub> (nm) | Thickness of MAgel <sub>3</sub> (nm) | ETLs (50 nm)     | Thickness of FTO (nm) | V <sub>oc</sub> (V) | J <sub>sc</sub> (mA/cm <sup>2</sup> ) | FF (%) | PCE (%) |
|------------------------|-----------------------------|--------------------------------------|------------------|-----------------------|---------------------|---------------------------------------|--------|---------|
| 350                    | 500                         | 500                                  | ZnSe             | 500                   | 0.9507              | 29.055972                             | 81.10  | 22.40   |
| 350                    | 500                         | 500                                  | TiO <sub>2</sub> | 500                   | 0.9478              | 29.362413                             | 83.20  | 23.18   |
| 350                    | 500                         | 500                                  | ZnO              | 500                   | 0.9487              | 29.397456                             | 82.85  | 23.11   |
| 350                    | 500                         | 500                                  | SnO <sub>2</sub> | 500                   | 0.9772              | 29.438141                             | 58.34  | 16.78   |
| 350                    | 500                         | 500                                  | WO <sub>3</sub>  | 500                   | 0.9943              | 29.322015                             | 36.10  | 10.52   |

## References

1. Singh, N.; Agarwal, A.; Agarwal, M. Numerical simulation of highly efficient lead-free all-perovskite tandem solar cell. *Sol. Energy* **2020**, *208*, 399–410.
2. Singh, N.; Agarwal, A.; Agarwal, M. Performance evaluation of lead-free double-perovskite solar cell. *Opt. Mater.* **2021**, *114*, 110964.
3. Otoufi, M.K.; Ranjbar, M.; Kermanpur, A.; Taghavinia, N.; Minbashi, M.; Forouzandeh, M.; Ebadi, F. Enhanced performance of planar perovskite solar cells using TiO<sub>2</sub>/SnO<sub>2</sub> and TiO<sub>2</sub>/WO<sub>3</sub> bilayer structures: Roles of the interfacial layers. *Sol. Energ.* **2020**, *208*, 697–707.
